# Supplementary material for: A call for transparency in tracking student and postdoc career outcomes
Source: PubMed Central journal article supplement — Mol Biol Cell. 2015 Apr 15;26(8):1413–5. doi: 10.1091/mbc.E14-10-1432 (PMC4395122; doi:10.1091/mbc.e14-10-1432), 2015-04-15
Supplement: supp_26.8.1413_CombinedSupMats.pdf [file supp_26.8.1413_CombinedSupMats.pdf]

# Supplemental Materials

*Molecular Biology of the Cell*

Polka et al.
